# Supplementary material for: Identification of prognostic biomarkers associated with the occurrence of portal vein tumor thrombus in hepatocellular carcinoma
Source: publisher site journal article supplement (doi:10.18632/aging.202876), 2021-04-20
Supplement: Supplementary file [file aging-v13i8-202876-supplementary-material-SD1.pdf]

## SUPPLEMENTARY FIGURES

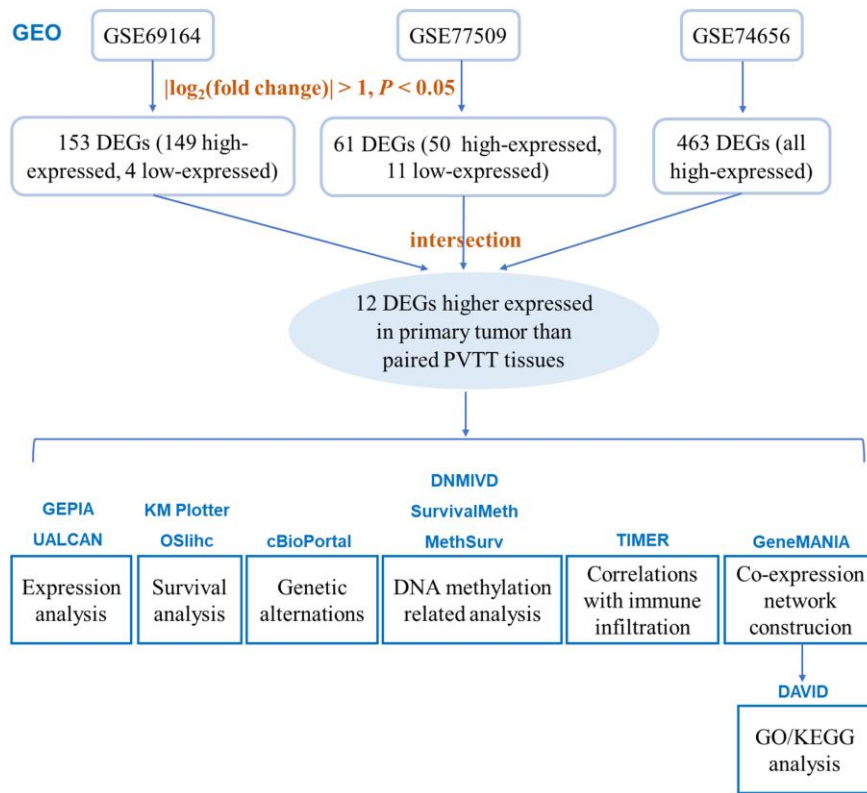

**Supplementary Figure 1. The workflow of this study.**

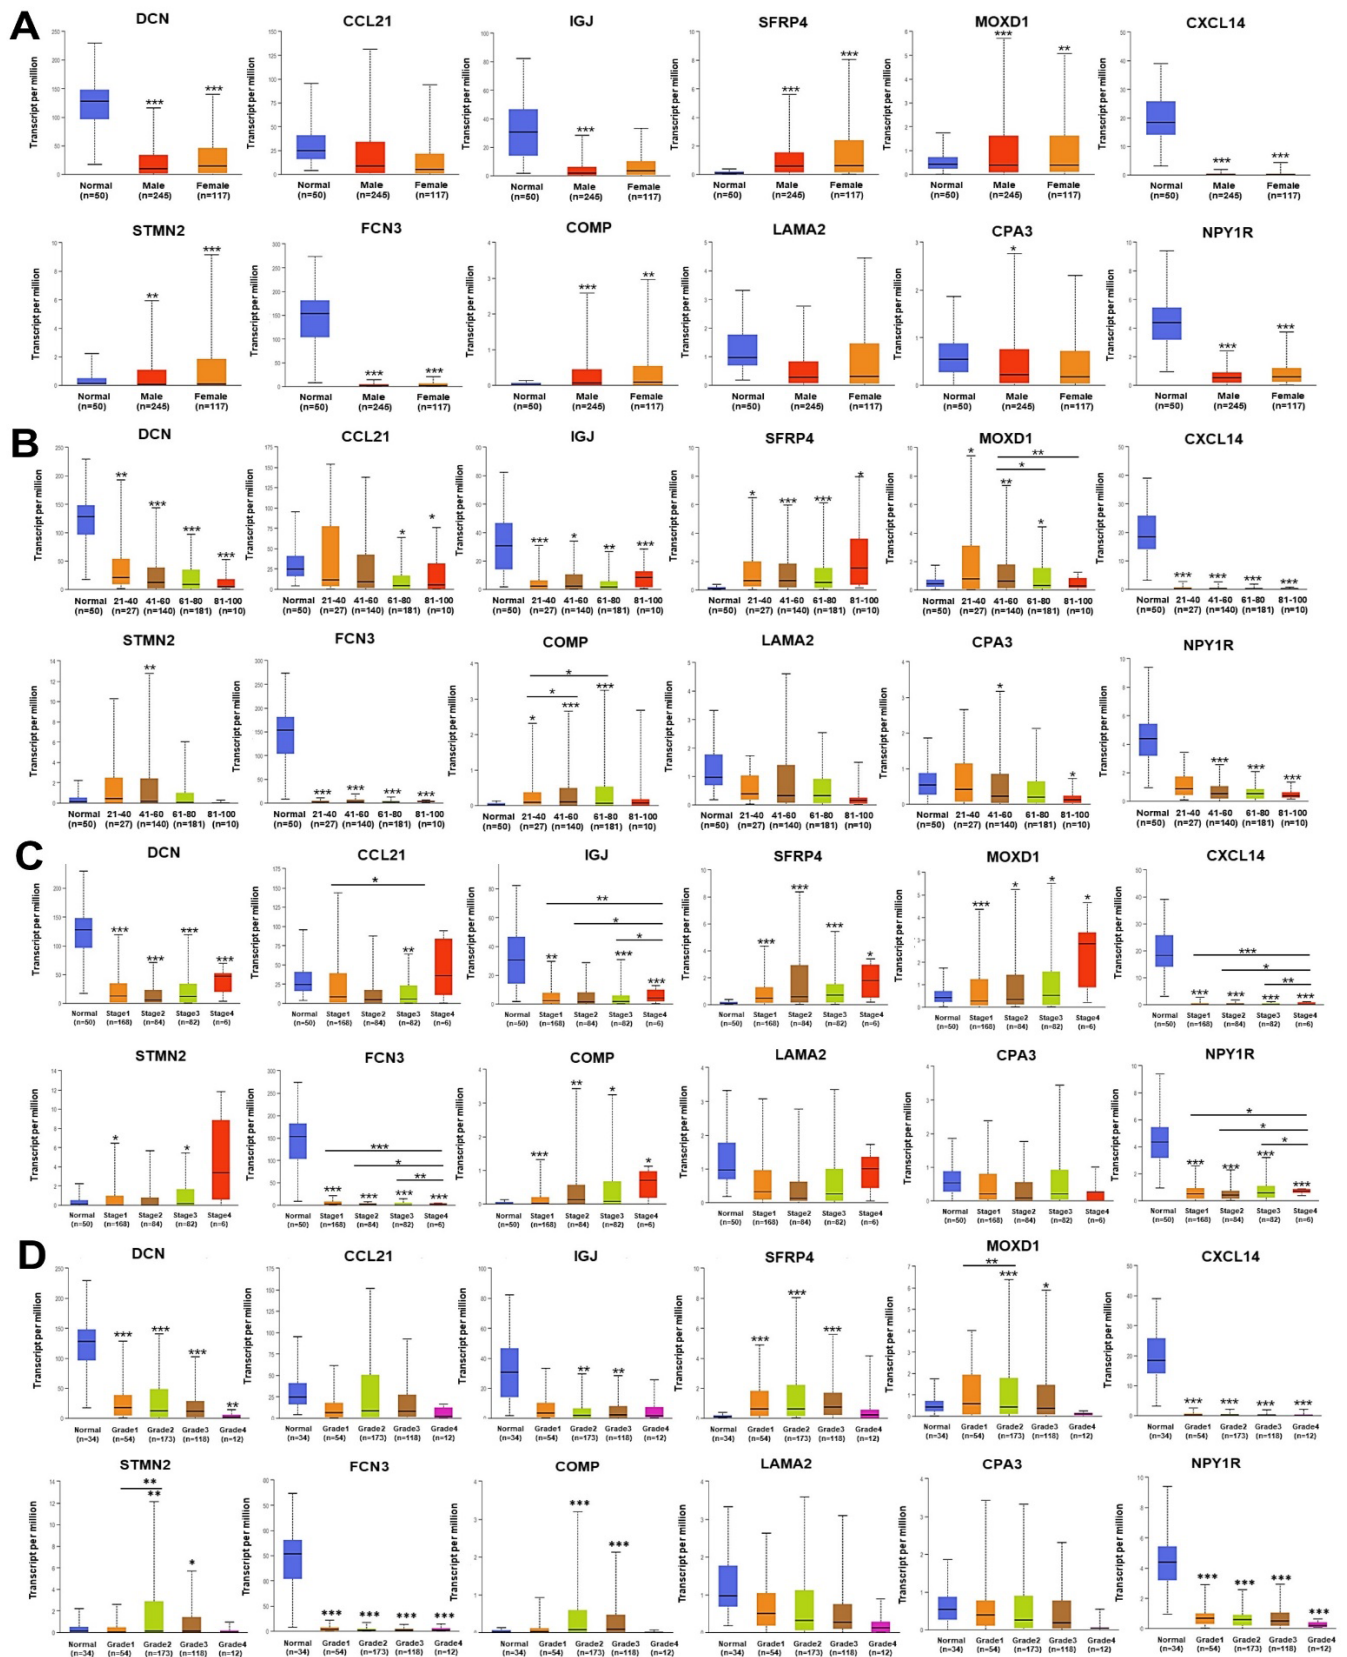

**Supplementary Figure 2. Expression of the 12 DEGs in HCC patients with distinct clinical parameters (UALCAN).** Expression of the 12 DEGs in HCC patients classified by (A) genders, (B) ages, (C) stages, and (D) grades. (\* $P < 0.05$ , \*\* $P < 0.01$ , \*\*\* $P < 0.001$ ).

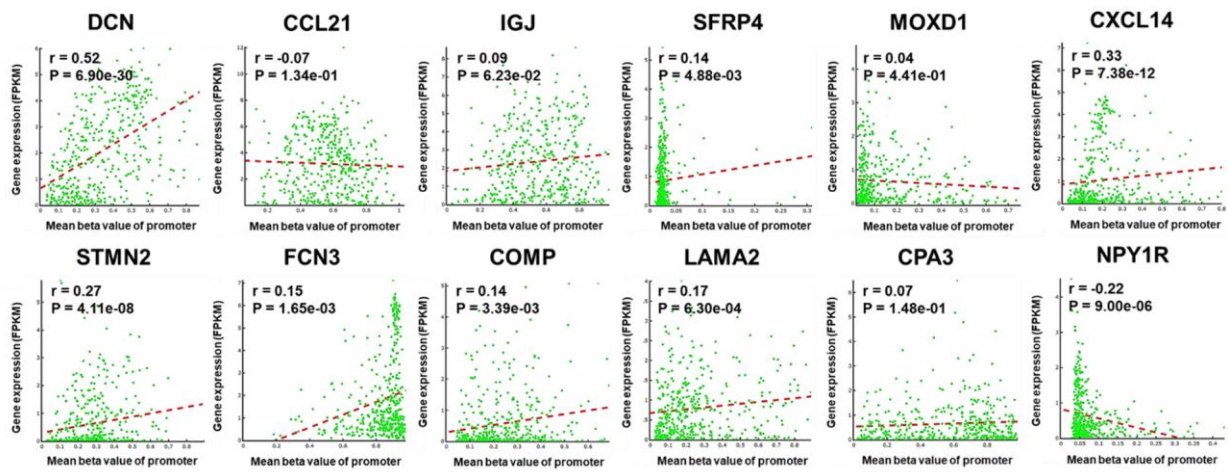

Supplementary Figure 3. The correlations between DNA methylation density and the mRNA expression level of the DEGs in HCC (DNMIVD).
