# Supplementary material for: Identification of prognostic biomarkers associated with the occurrence of portal vein tumor thrombus in hepatocellular carcinoma
Source: publisher site journal article supplement (doi:10.18632/aging.202876), 2021-04-20
Supplement: Supplementary file [file aging-v13i8-202876-supplementary-material-SD4.pdf]

**Supplementary Table 3. Co-occurrence tendency of pairs of alterations of the DEGs (cBioPortal).**

| <b>Gene1</b> | <b>Gene2</b> | <b>Log2 odds ratio</b> | <b>P value</b> | <b>Q value</b> | <b>Tendency</b> |
|--------------|--------------|------------------------|----------------|----------------|-----------------|
| DCN          | FCN3         | >3                     | <0.001         | <0.001         | co-occurrence   |
| MOXD1        | LAMA2        | >3                     | <0.001         | <0.001         | co-occurrence   |
| DCN          | MOXD1        | >3                     | <0.001         | <0.001         | co-occurrence   |
| DCN          | CXCL14       | >3                     | <0.001         | 0.001          | co-occurrence   |
| FCN3         | LAMA2        | >3                     | <0.001         | 0.003          | co-occurrence   |
| SFRP4        | COMP         | >3                     | <0.001         | 0.005          | co-occurrence   |
| DCN          | LAMA2        | 2.676                  | <0.001         | 0.009          | co-occurrence   |
| SFRP4        | STMN2        | >3                     | 0.001          | 0.009          | co-occurrence   |
| IGJ          | CXCL14       | >3                     | 0.003          | 0.02           | co-occurrence   |
| IGJ          | CPA3         | >3                     | 0.003          | 0.023          | co-occurrence   |
| STMN2        | NPY1R        | 2.644                  | 0.004          | 0.024          | co-occurrence   |
| MOXD1        | NPY1R        | >3                     | 0.008          | 0.046          | co-occurrence   |

*Note:* Odds ratio = (odds of alteration in Gene2 given alteration in Gene1)/(odds of alteration in Gene2 given lack of alteration in Gene1). A positive value of “Log2 odds ratio” suggests alternations in a pair of genes co-occur in the same samples, while a negative value suggests alternations in a pair of genes are mutually exclusive and tend to occur in different samples.
